# Supplementary material for: Climate-change Induced Multi-hazard Risk Assessment of Himachal Pradesh in Western Himalayan Region Using IPCC-AR6 Framework and Multi-Attribute Decision-Making Approach
Source: Research Square preprint supplement (doi:10.21203/rs.3.rs-8565899/v1), 2026-01-23
Supplement: Supplementary file 1 [file 93656090382ef5cfc150d908.docx]

Table 1: Components, sub-components, and indicators used for risk assessment of Himachal Pradesh along with their functional relationship and data source

| Component of risk | Sub Components | Indicators | Functional Relationship | Rationale | Data source |
| --- | --- | --- | --- | --- | --- |
| Hazard |  | Percentage of state population Vulnerable to earthquake | Positive (+) | A higher percentage of the state population vulnerable to earthquakes increases the overall risk level, as greater exposure amplifies the potential impact of seismic hazards on human lives and infrastructure. | Himachal Pradesh Vulnerability Atlas |
|  | Percentage of sate population vulnerable to land slide (Severe to very high, high, and moderate | Positive (+) | A higher percentage of the state population residing in areas with moderate to very high landslide vulnerability increases overall risk, as it indicates greater exposure and potential impact on human settlements and livelihoods. | Himachal Pradesh Vulnerability Atlas |
|  | Total number of disastrous cold wave days annually from 1969 to 2019 | Positive (+) | An increased number of disastrous cold wave days annually from 1969 to 2019 elevates the overall risk, as prolonged exposure to extreme cold events heightens the vulnerability of both human and ecological systems in the region. | Climate hazard and Vulnerability Atlas of India |
|  | Total number of disastrous heat wave days annually from 1969 to 2019 | Positive (+) | A higher number of disastrous heat wave days annually from 1969 to 2019 increases the overall risk, as frequent extreme heat events intensify threats to human health, agriculture, and water resources in the region. | Climate hazard and Vulnerability Atlas of India |
|  | Total occurrences of flood events from 1969 to 2019 | Positive (+) | A greater number of flood events from 1969 to 2019 contributes to higher overall risk, as repeated flooding exacerbates exposure and damages to infrastructure, livelihoods, and ecosystems in the region. | Climate hazard and Vulnerability Atlas of India |
|  | All category (moderate, severe, and extreme) drought normalized vulnerability index (based on standardized precipitation index) | Positive (+) | A higher normalized vulnerability index for all categories of drought (moderate, severe, and extreme), based on the standardized precipitation index, increases overall risk by indicating greater susceptibility to water scarcity and its cascading impacts on agriculture, livelihoods, and ecosystem stability. | Hazard Atlas of India |
|  | Average number of fog days annually from 1981 to 2010 | Positive (+) | An increased average number of fog days annually from 1981 to 2010 elevates overall risk, as frequent fog events reduce visibility, disrupt transportation, and contribute to health and safety hazards in the region. | Hazard Atlas of India |
|  | Extreme wind speed (in meters per second) annually | Positive (+) | Higher annual extreme wind speeds increase overall risk, as intense winds can cause significant damage to infrastructure, agriculture, and forest cover, thereby amplifying the region's vulnerability to climate-related hazards. | Hazard Atlas of India |
|  | Total number of snowfall days annually from 1969 to 2019 | Positive (+) | A higher total number of snowfall days annually from 1969 to 2019 increases overall risk, as excessive snowfall can lead to avalanches, infrastructure disruptions, and isolation of communities in the mountainous terrain. | Climate hazard and Vulnerability Atlas of India |
|  | Average number of hailstorm days annually from 1981 to 2010 | Positive (+) | A higher average number of hailstorm days annually from 1981 to 2010 increases overall risk, as frequent hailstorms can cause substantial damage to crops, property, and livestock, thereby heightening vulnerability in the region. | Hazard Atlas of India |
|  | Average number of lightning flashes per km2 per day annually from 1983 to 2013 | Positive (+) | A higher average number of lightning flashes per km² per day annually from 1983 to 2013 increases overall risk, as frequent lightning events pose direct threats to human life, livestock, forests, and infrastructure in the region. | Hazard Atlas of India |
|  | Average number of thunderstorm days annually from 1981 to 2010 | Positive (+) | A higher average number of thunderstorm days annually from 1981 to 2010 increases overall risk, as frequent thunderstorms are often accompanied by hazardous weather conditions such as lightning, strong winds, and heavy rainfall, which can disrupt livelihoods and damage infrastructure in the region. | Hazard Atlas of India |
|  | Extreme maximum temperature from 1981 to 2022 | Positive (+) | An increase in extreme maximum temperatures from 1981 to 2022 elevates overall risk, as higher temperature extremes intensify heat-related health issues, stress on water and agriculture systems, and the likelihood of associated climate hazards in the region. | MEERA-2, NASA Power data |
|  | Extreme minimum temperature from 1981 to 2022 | Positive (+) | An increase in extreme minimum temperatures from 1981 to 2022 raises overall risk, as it can disrupt ecological balances, affect crop cycles, and increase the vulnerability of both human and natural systems to climate-induced stress in the region. | MEERA-2, NASA Power data |
|  | Average annual mean temperature from 1981 to 2022 | Positive (+) | An increase in average annual mean temperature from 1981 to 2022 contributes to higher overall risk, as sustained warming accelerates glacial melt, alters hydrological patterns, and intensifies the frequency and severity of climate-induced hazards in the Western Himalayan region. | MEERA-2, NASA Power data |
|  | Precipitation variability | Positive (+) | Greater precipitation variability increases overall risk, as irregular and unpredictable rainfall patterns can lead to both droughts and floods, disrupting water availability, agriculture, and ecosystem stability in the Western Himalayan region. | MEERA-2, NASA Power data |
|  | Average annual cloud coverage from 1981 to 2022 | Positive (+) | An increase in average annual cloud coverage from 1981 to 2022 elevates overall risk, as persistent cloudiness can alter local microclimates, reduce solar radiation for agriculture, and contribute to extreme weather events such as intense rainfall or fog in the Western Himalayan region. | MEERA-2, NASA Power data |
|  | Elevation | Positive (+) | Higher elevation is positively associated with risk, as steep and rugged terrains in elevated areas are more prone to climate-induced hazards such as landslides, avalanches, and glacial lake outburst floods, increasing the vulnerability of communities and infrastructure. | SRTM DEM, USGS |
|  | Slope | Positive (+) | Steeper slopes are positively associated with risk, as they enhance the likelihood of landslides, soil erosion, and runoff during extreme weather events, thereby increasing hazard exposure and vulnerability in the Western Himalayan region. | SRTM DEM, USGS |
| Vulnerability | Sensitivity | Percentage of female population | Positive (+) | A higher percentage of female population is positively associated with risk, as women—especially in rural and mountainous regions—often face greater socio-economic vulnerabilities, limited access to resources, and reduced decision-making power, which can amplify the impacts of climate-induced hazards. | Census of India, 2011 |
| Percentage of female headed household | Positive (+) | A higher percentage of female-headed households is positively associated with risk, as these households often have limited access to resources, lower economic resilience, and reduced adaptive capacity, making them more vulnerable to the impacts of climate-related hazards in the Western Himalayan region. | Census of India, 2011 |
| Percentage of population below six years | Positive (+) | A higher percentage of population below six years is positively associated with risk, as young children are more physically and socially vulnerable to climate-related hazards, requiring greater care, protection, and resources during and after disaster events. | Census of India, 2011 |
| Percentage of population above 60 years | Positive (+) | A higher percentage of population above 60 years is positively associated with risk, as elderly individuals typically have reduced mobility, greater health vulnerabilities, and limited adaptive capacity, making them more susceptible to the adverse impacts of climate-induced hazards. | Census of India, 2011 |
| Percentage of rural population to total population | Positive (+) | A higher percentage of rural population to total population is positively associated with risk, as rural communities in the Western Himalayan region often have limited access to infrastructure, healthcare, early warning systems, and adaptive resources, increasing their vulnerability to climate-induced hazards. | Census of India, 2011 |
| Percentage of S.C. population | Positive (+) | A higher percentage of Scheduled Caste (S.C.) population is positively associated with risk, as these socially marginalized communities often face systemic disadvantages, limited access to resources, and reduced adaptive capacity, making them more vulnerable to climate-induced hazards. | Census of India, 2011 |
| Percentage of S.T. population | Positive (+) | A higher percentage of Scheduled Tribe (S.T.) population is positively associated with risk, as tribal communities in the Western Himalayan region often reside in ecologically fragile and hazard-prone areas with limited access to infrastructure, healthcare, and adaptive resources, increasing their overall vulnerability to climate-induced risks. | Census of India, 2011 |
| People with disability at risk | Positive (+) | A higher proportion of people with disabilities is positively associated with risk, as they often face mobility challenges, communication barriers, and limited access to emergency services, making them more vulnerable during and after climate-induced hazard events. | Himachal Pradesh Vulnerability Atlas |
| Percentage of non-working population | Positive (+) | A higher percentage of non-working population is positively associated with risk, as economically inactive individuals often have limited financial resources and reduced adaptive capacity, making them more susceptible to the impacts of climate-induced hazards. | Census of India, 2011 |
| No of marginal farmer | Positive (+) | A higher number of marginal farmers is positively associated with risk, as they typically possess limited landholdings, low income, and minimal access to adaptive resources, making them highly vulnerable to the adverse impacts of climate-induced hazards. | Census of India, 2011 |
| Illiteracy rate | Positive (+) | A higher illiteracy rate is positively associated with risk, as low literacy levels hinder awareness, access to critical information, and the capacity to respond effectively to climate-induced hazards. | Census of India, 2011 |
| Percentage of dilapidated households | Positive (+) | A higher percentage of dilapidated households is positively associated with risk, as structurally weak and poorly maintained homes are more vulnerable to damage and destruction during climate-induced hazards and extreme weather events. | Census of India, 2011 |
| Percentage of households with material of roof as grass/ bamboo / thatch / wood / mud / plastic / polythene | Positive (+) | A higher percentage of households with roofs made of grass, bamboo, thatch, wood, mud, plastic, or polythene increases disaster risk, as these materials offer low structural resilience against extreme weather events and climate-induced hazards. | Census of India, 2011 |
| Percentage of households with material of wall as grass/ bamboo / thatch / wood / mud / plastic / polythene / un brunt brick / stones / non packed with mortrar | Positive (+) | A higher percentage of households with walls made of grass, bamboo, thatch, wood, mud, plastic, polythene, unburnt bricks, or loose stones without mortar indicates poor structural integrity, thereby increasing vulnerability and risk to climate-induced multi-hazards. | Census of India, 2011 |
| Percentage of households not having latrine facility within the premises | Positive (+) | A higher percentage of households lacking latrine facilities within the premises reflects inadequate sanitation infrastructure, which exacerbates health vulnerabilities and limits community resilience during and after climate-induced hazard events. | Census of India, 2011 |
| Adaptive capacity | Total work participation rate | Negative (-) | A higher total work participation rate indicates greater economic engagement and self-reliance among the population, which enhances adaptive capacity and thereby reduces multi-hazard risk. | Census of India, 2011 |
| Female work participation rate | Negative (-) | A higher female work participation rate reflects greater gender-inclusive economic resilience and social empowerment, which enhances adaptive capacity and thus reduces overall multi-hazard risk. | Census of India, 2011 |
| Male literacy rate | Negative (-) | A higher male literacy rate contributes to better access to information, awareness, and decision-making capacity during climate-related hazards, thereby reducing overall multi-hazard risk. | Census of India, 2011 |
| Female literacy rate | Negative (-) | A higher female literacy rate enhances awareness, preparedness, and adaptive capacity at the household and community levels, thereby reducing vulnerability and overall multi-hazard risk. | Census of India, 2011 |
| Rural literacy rate | Negative (-) | A higher rural literacy rate improves access to information, disaster awareness, and adaptive decision-making in rural communities, thereby decreasing their vulnerability and reducing multi-hazard risk. | Census of India, 2011 |
| S.T. literacy rate | Negative (-) | A higher Scheduled Tribe (S.T.) literacy rate enhances awareness, preparedness, and adaptive capacity among Indigenous communities, thereby reducing their vulnerability to climate-induced multi-hazard risks. | Census of India, 2011 |
| Sex ratio | Negative (-) | A higher sex ratio (more females per 1000 males) often indicates better gender balance and social development, which can enhance community resilience and reduce vulnerability to climate-induced multi-hazard risks. | Census of India, 2011 |
| Percentage of households living owned house | Negative (-) | A lower percentage of households living in owned houses indicates higher socio-economic vulnerability, reducing their capacity to adapt to climate-induced multi-hazard risks. | Census of India, 2011 |
| Percentage of households having radio | Negative (-) | A lower percentage of households having radios limits access to timely early warning information and awareness about climate-related hazards, increasing their vulnerability to multi-hazard risks. | Census of India, 2011 |
| Percentage of households having television | Negative (-) | A lower percentage of households having televisions hampers access to vital information, awareness campaigns, and early warning systems, thereby increasing vulnerability to climate-induced multi-hazard risks. | Census of India, 2011 |
| Percentage of households having computer / laptop | Negative (-) | A lower percentage of households having computers or laptops reflects limited access to digital information, education, and disaster preparedness resources, thereby heightening vulnerability to climate-induced multi-hazard risks. | Census of India, 2011 |
| Percentage of households having internet | Negative (-) | A lower percentage of households having internet access restricts real-time communication, access to early warning systems, and adaptive knowledge, thereby increasing susceptibility to climate-induced multi-hazard risks. | Census of India, 2011 |
| Percentage of households having landline only | Negative (-) | A higher percentage of households having only landline connections indicates limited access to mobile and internet-based communication, reducing responsiveness to early warnings and adaptive measures, thus increasing vulnerability to multi-hazard risks. | Census of India, 2011 |
| Percentage of households having mobile only | Negative (-) | A higher percentage of households having only mobile phones, without complementary access to internet or other communication devices, may indicate limited access to comprehensive information and digital services, thereby constraining adaptive capacity and increasing vulnerability to multi-hazard risks. | Census of India, 2011 |
| Percentage of main worker to total population | Negative (-) | A lower percentage of main workers to total population reflects economic dependency and limited livelihood stability, which weakens household resilience and adaptive capacity to climate-induced multi-hazard risks. | Census of India, 2011 |
| Percentage of household with access to two wheeler | Negative (-) | A lower percentage of households with access to two-wheelers indicates reduced mobility and limited access to emergency services, markets, and evacuation during hazards, thereby increasing vulnerability to multi-hazard risks. | Census of India, 2011 |
| Percentage of households with access to four wheeler | Negative (-) | A lower percentage of households with access to four-wheelers limits transportation options for evacuation, access to healthcare, and relief during climate-induced hazards, thereby increasing vulnerability to multi-hazard risks. | Census of India, 2011 |
| Percentage of households availing banking service | Negative (-) | A lower percentage of households availing banking services indicates limited financial inclusion and access to credit or insurance, reducing their capacity to prepare for, respond to, and recover from climate-induced multi-hazard risks. | Census of India, 2011 |
| Percentage of households using cleaner source of energy for cooking | Negative (-) | A lower percentage of households using cleaner sources of energy for cooking reflects greater reliance on traditional fuels, which contributes to indoor air pollution and health vulnerabilities, thereby compounding the risks posed by climate-induced multi-hazard events. | Census of India, 2011 |
| Percentage of households with access to drinking water source within premise | Negative (-) | A lower percentage of households with access to drinking water within the premises increases exposure to environmental hazards and health risks, reducing adaptive capacity and heightening vulnerability to climate-induced multi-hazard impacts. | Census of India, 2011 |
| Percentage of households with access to bathroom facility within premises | Negative (-) | A lower percentage of households with access to bathroom facilities within premises indicates poor sanitation and hygiene conditions, which elevate health risks and reduce resilience to climate-induced multi-hazard events. | Census of India, 2011 |
| Percentage of households having covered drainage as against open drainage or no drainage | Negative (-) | A lower percentage of households having covered drainage, compared to open or no drainage, leads to poor sanitation and increased risk of waterborne diseases, thereby exacerbating vulnerability to climate-induced multi-hazard impacts. | Census of India, 2011 |
| Percentage of households having electricity as the main source of lightning | Negative (-) | A lower percentage of households having electricity as the main source of lighting reflects inadequate infrastructure and limited access to essential services, thereby reducing resilience and adaptive capacity to climate-induced multi-hazard risks. | Census of India, 2011 |
| Per capita net district domestic product 2015-16 | Negative (-) | A lower per capita net district domestic product (2015–16) indicates weaker economic conditions and limited resources for adaptation and disaster preparedness, thereby increasing vulnerability to climate-induced multi-hazard risks. | District domestic product of Himachal Pradesh, 2011-12 to 2015-16 |
| No of beds available in health institution per 1000 population | Negative (-) | A lower number of beds available in health institutions per 1,000 population signifies limited healthcare capacity, hindering effective response to health emergencies during climate-induced multi-hazard events and increasing overall vulnerability. | Census of India, 2011 |
| Percentage of cultivator to total worker | Negative (-) | A higher percentage of cultivators to total workers indicates greater dependency on climate-sensitive agriculture, thereby increasing exposure and vulnerability to climate-induced multi-hazard risks. | Census of India, 2011 |
| Percentage of agriculture laborers to total worker | Positive (+) | A lower percentage of agricultural laborers to total workers suggests a shift towards more diversified and potentially resilient livelihood sources, thereby enhancing adaptive capacity and reducing vulnerability to climate-induced multi-hazard risks. | Census of India, 2011 |
| Per cultivator net area sown | Negative (-) | A lower per cultivator net area sown indicates limited landholding size, which constrains agricultural productivity and income, thereby increasing vulnerability to climate-induced multi-hazard risks. | Census of India, 2011 and Statistical abstract of Himachal Pradesh, 2021-22 |
| Number of livestock per 10000 population | Negative (-) | A lower number of livestock per 10,000 population reflects reduced livelihood diversification and food security, thereby diminishing resilience and increasing vulnerability to climate-induced multi-hazard risks. | Statistical abstract of Himachal Pradesh, 2021-22 |
| Percentage of pucca house | Negative (-) | A lower percentage of pucca houses indicates poor housing quality and structural vulnerability, increasing the risk of damage and loss during climate-induced multi-hazard events. | Census of India, 2011 |
| Cropping intensity | Negative (-) | A lower cropping intensity reflects underutilization of agricultural land and limited food production, which can reduce livelihood security and increase vulnerability to climate-induced multi-hazard risks. | Statistical abstract of Himachal Pradesh, 2021-22 |
| Irrigation intensity | Negative (-) | A lower irrigation intensity indicates high dependence on rainfall and limited water infrastructure, increasing susceptibility to droughts and other climate-induced multi-hazard risks. | Statistical abstract of Himachal Pradesh, 2021-22 |
| Crop diversification index | Negative (-) | A lower crop diversification index signifies dependence on a narrow range of crops, reducing agricultural resilience and increasing vulnerability to climate-induced multi-hazard risks such as pest outbreaks, droughts, or market shocks. | Statistical abstract of Himachal Pradesh, 2021-22 |
| Horticulture efficiency index | Negative (-) | A lower horticulture efficiency index indicates suboptimal use of land and resources for high-value crops, limiting income diversification and adaptive capacity, thereby increasing vulnerability to climate-induced multi-hazard risks. | Statistical abstract of Himachal Pradesh, 2021-22 |
| Total food grain yield | Negative (-) | A lower total food grain yield reflects reduced agricultural productivity and food security, thereby heightening exposure and vulnerability to climate-induced multi-hazard risks in the region. | Statistical abstract of Himachal Pradesh, 2021-22 |
| Per capita food grain production | Negative (-) | A lower per capita food grain production indicates insufficient local food availability relative to population size, increasing food insecurity and vulnerability to climate-induced multi-hazard risks. | Statistical abstract of Himachal Pradesh, 2021-22 |
| Population served per bank | Negative (-) | A higher population served per bank indicates limited access to financial services, which constrains households' ability to save, invest, and recover from climate-induced multi-hazard events, thereby increasing their vulnerability. | Census of India, 2011 |
| Density of school | Negative (-) | A lower density of schools limits access to education, reducing community awareness, adaptive capacity, and long-term resilience to climate-induced multi-hazard risks. | Census of India, 2011 |
| Livestock density | Negative (-) | A higher livestock density can lead to overgrazing, land degradation, and increased pressure on natural resources, thereby exacerbating environmental vulnerability and susceptibility to climate-induced multi-hazard risks. | Statistical abstract of Himachal Pradesh, 2021-22 |
| No of medical institutions / 10000 population | Negative (-) | A lower number of medical institutions per 10,000 population indicates inadequate healthcare infrastructure, which limits the community’s capacity to respond to and recover from climate-induced health emergencies and multi-hazard risks. | Statistical abstract of Himachal Pradesh, 2021-22 |
| No. of family welfare Centre / 5000 population | Negative (-) | A lower number of family welfare centres per 5,000 population reflects limited access to essential health and reproductive services, weakening social resilience and increasing vulnerability to climate-induced multi-hazard impacts in the region. | Census of India, 2011 |
| Literacy rate | Negative (-) | A higher literacy rate may have a negative impact in this context if it is associated with increased awareness and reporting of climate-related risks and vulnerabilities, which can elevate the perceived exposure and sensitivity within the IPCC-AR6 risk assessment framework. | Census of India, 2011 |
| Exposure | Space | Population growth rate | Positive (+) | A moderate population growth rate may have a positive impact by ensuring a balanced demographic structure that supports adaptive capacity through labor availability and community resilience in managing climate and hazard-related challenges. | Census of India, 2011 |
| Population density | Positive (+) | A moderate population density can have a positive impact by fostering stronger social networks, better access to services, and more efficient resource distribution, which collectively enhance community resilience to climate-induced multi-hazard risks. | Census of India, 2011 |
| Percentage of area under agriculture | Positive (+) | A higher percentage of area under agriculture positively contributes to livelihood security and food self-sufficiency, enhancing the region’s adaptive capacity to climate-induced multi-hazard risks. | Statistical abstract of Himachal Pradesh, 2021-22 |
| Percentage of permanent pastures & other grazing lands | Positive (+) | A higher percentage of permanent pastures and other grazing lands supports livestock-based livelihoods and ecological stability, thereby strengthening the region’s resilience to climate-induced multi-hazard risks. | Statistical abstract of Himachal Pradesh, 2021-22 |
| Percentage of households having no exclusive room | Positive (+) | A higher percentage of households having no exclusive room may indicate lower exposure to asset loss during climate-induced hazards, as such households typically own fewer material possessions and structures at risk. | Census of India, 2011 |
| Road density | Negative (-) | Higher road density positively impacts climate change and multi-hazard resilience by improving accessibility, enabling quicker evacuation, better emergency response, and easier access to relief and health services during disasters. | Census of India, 2011 |
| Agriculture dependent population | Positive (+) | A higher proportion of agriculture-dependent population positively influences multi-hazard resilience as traditional agricultural knowledge and diversified livelihood practices can enhance local adaptive capacity to climate-related risks in the Western Himalayan region. | Census of India, 2011 |
